# Supplementary material
Source: PubMed Central journal article supplement (PMC3578575)
Supplement: ismej2012124x1.pdf [file ismej2012124x1.pdf]

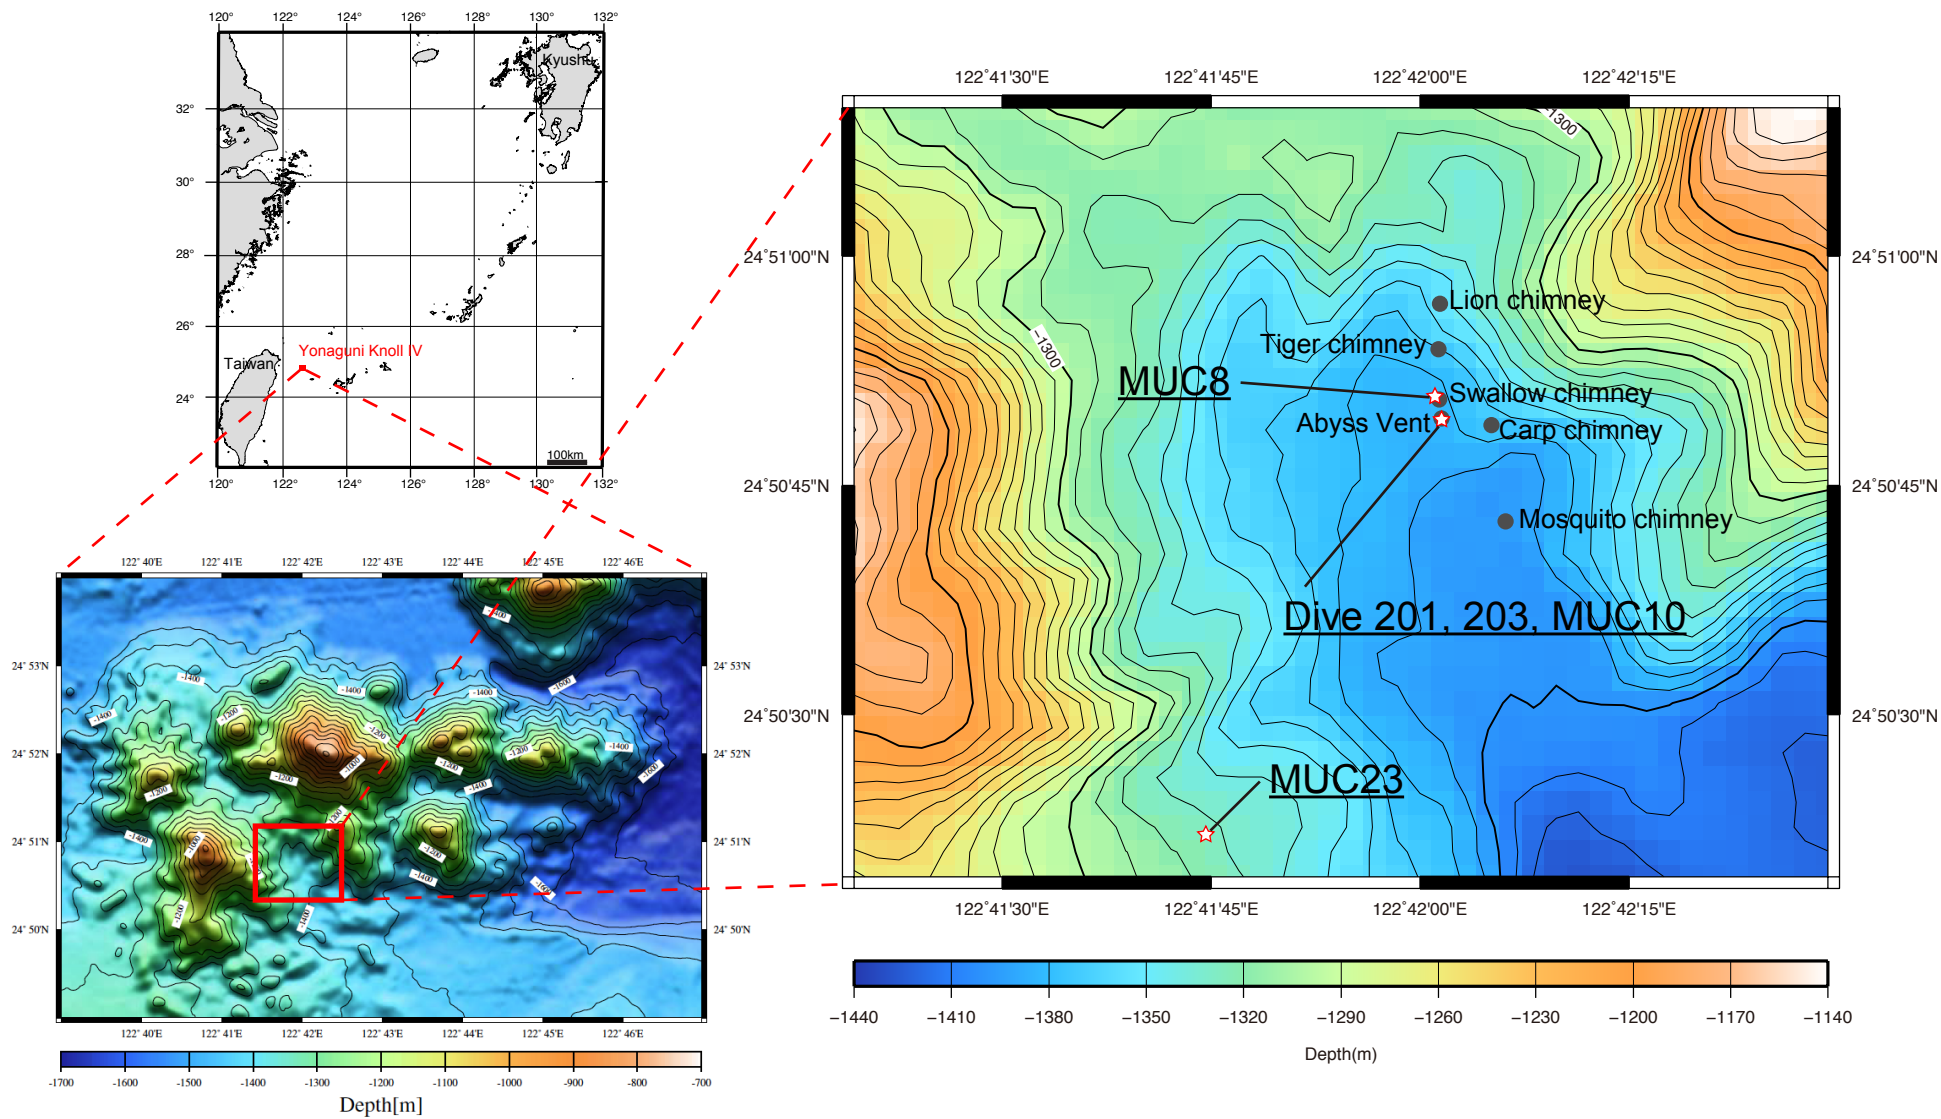

**Supplementary Figure S1.** Location of CO<sub>2</sub>-seep (MUC8, MUC10, Dive 201, and Dive 203) and reference (MUC23) sampling sites.
